# Supplementary material
Source: PubMed Central journal article supplement (PMC9166325)
Supplement: JCOPDF-9-135-s001.pdf [file JCOPDF-9-135-s001.pdf]

**Online Supplement**

**Trends and Characteristics of Global Initiative for Chronic Obstructive Lung Disease Guidelines-Discordant Prescribing of Triple Therapy Among Patients with COPD**

Surya P. Bhatt, MD, MSPH<sup>1</sup> Cori Blauer-Peterson, MPH<sup>2</sup> Erin K. Buysman, MS<sup>2</sup> Lindsay G.S. Bengtson, PhD, MPH<sup>2</sup> Swetha R. Palli, MS<sup>3</sup>

<sup>1</sup>Division of Pulmonary, Allergy, and Critical Care Medicine, University of Alabama at Birmingham, Birmingham, Alabama, United States

<sup>2</sup>Health Economics and Outcomes Research, Optum, Eden Prairie, Minnesota, United States

<sup>3</sup>Value Demonstration Team, Boehringer Ingelheim, Ridgefield, Connecticut, United States

## SUPPLEMENTARY FILES

**Table S1.** Characteristics of Exacerbation-Discordant TT Initiators, by Index Year

|                                                          | Index Year          |                                         |                                         |                                         |                                         |                                         | 2018 Subset:<br>Closed TT<br>(n=1,488;<br>35.5% of<br>2018) <sup>a</sup> |
|----------------------------------------------------------|---------------------|-----------------------------------------|-----------------------------------------|-----------------------------------------|-----------------------------------------|-----------------------------------------|--------------------------------------------------------------------------|
|                                                          | Total<br>(N=13,435) | 2014<br>(n=2,309;<br>17.2% of<br>Total) | 2015<br>(n=2,022;<br>15.1% of<br>Total) | 2016<br>(n=2,076;<br>15.5% of<br>Total) | 2017<br>(n=2,838;<br>21.1% of<br>Total) | 2018<br>(n=4,190;<br>31.2% of<br>Total) |                                                                          |
| <b>Demographic Characteristics</b>                       |                     |                                         |                                         |                                         |                                         |                                         |                                                                          |
| Age, years, mean (SD)                                    | 69.5 (9.6)          | 68.8 (9.5)                              | 69.9 (9.7)                              | 69.2 (9.8)                              | 69.4 (9.5)                              | 69.8 (9.6)                              | 69.7 (9.6)                                                               |
| Age group, n (%)                                         |                     |                                         |                                         |                                         |                                         |                                         |                                                                          |
| 40-49                                                    | 256 (1.9)           | 45 (2.0)                                | 37 (1.8)                                | 46 (2.2)                                | 55 (1.9)                                | 73 (1.7)                                | 25 (1.7)                                                                 |
| 50-59                                                    | 1972 (14.7)         | 363 (15.7)                              | 294 (14.5)                              | 322 (15.5)                              | 406 (14.3)                              | 587 (14.0)                              | 209 (14.1)                                                               |
| 60-64                                                    | 1893 (14.2)         | 322 (14.0)                              | 264 (13.1)                              | 311 (15.0)                              | 407 (14.3)                              | 589 (14.1)                              | 233 (15.7)                                                               |
| 65-69                                                    | 2415 (18.0)         | 450 (19.5)                              | 370 (18.3)                              | 381 (18.4)                              | 501 (17.7)                              | 713 (17.0)                              | 214 (14.4)                                                               |
| 70-74                                                    | 2736 (20.4)         | 508 (22.0)                              | 377 (18.6)                              | 387 (18.6)                              | 606 (21.4)                              | 858 (20.5)                              | 324 (21.8)                                                               |
| 75+                                                      | 4163 (31.0)         | 621 (26.9)                              | 680 (33.6)                              | 629 (30.3)                              | 863 (30.4)                              | 1370 (32.7)                             | 483 (32.5)                                                               |
| Male gender, n (%)                                       | 7005 (52.1)         | 1221 (52.9)                             | 1075 (53.2)                             | 1100 (53.0)                             | 1463 (51.6)                             | 2146 (51.2)                             | 789 (53.0)                                                               |
| Region, n (%)                                            |                     |                                         |                                         |                                         |                                         |                                         |                                                                          |
| Northeast                                                | 1957 (14.6)         | 433 (18.8)                              | 356 (17.6)                              | 304 (14.6)                              | 347 (12.2)                              | 517 (12.3)                              | 141 (9.5)                                                                |
| Midwest                                                  | 3910 (29.1)         | 721 (31.2)                              | 665 (32.9)                              | 646 (31.1)                              | 791 (27.9)                              | 1087 (25.9)                             | 348 (23.4)                                                               |
| South                                                    | 6299 (46.9)         | 914 (39.6)                              | 792 (39.2)                              | 920 (44.3)                              | 1429 (50.4)                             | 2244 (53.6)                             | 896 (60.2)                                                               |
| West                                                     | 1269 (9.5)          | 241 (10.4)                              | 209 (10.3)                              | 206 (9.9)                               | 271 (9.6)                               | 342 (8.2)                               | 103 (6.9)                                                                |
| Insurance type, n (%)                                    |                     |                                         |                                         |                                         |                                         |                                         |                                                                          |
| Commercial                                               | 3285 (24.5)         | 719 (31.1)                              | 533 (26.4)                              | 644 (31.0)                              | 588 (20.7)                              | 801 (19.1)                              | 316 (21.2)                                                               |
| Medicare Advantage Part D                                | 10150 (75.6)        | 1590 (68.9)                             | 1489 (73.6)                             | 1432 (69.9)                             | 2250 (79.3)                             | 3389 (80.9)                             | 1172 (78.8)                                                              |
| <b>Baseline Clinical Characteristics</b>                 |                     |                                         |                                         |                                         |                                         |                                         |                                                                          |
| Elixhauser Score, excluding COPD, mean (SD) <sup>b</sup> | 5.67 (8.41)         | 5.41 (8.30)                             | 5.73 (8.08)                             | 5.50 (8.38)                             | 5.93 (8.57)                             | 5.69 (8.51)                             | 5.3 (8.1)                                                                |
| <b>Comorbid conditions, n (%)</b>                        |                     |                                         |                                         |                                         |                                         |                                         |                                                                          |
| Allergic rhinitis                                        | 1548 (11.5)         | 231 (10.0)                              | 196 (9.7)                               | 236 (11.4)                              | 328 (11.6)                              | 557 (13.3)                              | 212(14.2)                                                                |
| Anxiety                                                  | 2589 (19.3)         | 332 (14.4)                              | 306 (15.1)                              | 405 (19.5)                              | 628 (22.1)                              | 918 (21.9)                              | 306 (20.6)                                                               |
| Arrhythmia                                               | 2767 (20.6)         | 464 (20.1)                              | 431 (21.3)                              | 410 (19.8)                              | 589 (20.8)                              | 873 (20.8)                              | 301 (20.2)                                                               |
| Atrial fibrillation                                      | 1841 (13.7)         | 287 (12.4)                              | 280 (13.9)                              | 270 (13.0)                              | 412 (14.5)                              | 592 (14.1)                              | 198 (13.3)                                                               |
| Congestive heart failure                                 | 2476 (18.4)         | 365 (15.8)                              | 366 (18.1)                              | 349 (16.8)                              | 576 (20.3)                              | 820 (19.6)                              | 262 (17.6)                                                               |
| Depression                                               | 3077 (22.9)         | 461 (20.0)                              | 403 (19.9)                              | 450 (21.7)                              | 698 (24.6)                              | 1065 (25.4)                             | 334 (22.5)                                                               |
| Dyspnea                                                  | 7481 (55.7)         | 1250 (54.1)                             | 1121 (55.4)                             | 1190 (57.3)                             | 1567 (55.2)                             | 2353 (56.2)                             | 859 (57.7)                                                               |
| Ischemic heart disease                                   | 4321 (32.2)         | 700 (30.3)                              | 602 (29.8)                              | 620 (29.9)                              | 945 (33.3)                              | 1454 (34.7)                             | 538 (36.2)                                                               |
| Metabolic syndrome                                       | 11714 (87.2)        | 1981 (85.8)                             | 1703 (84.2)                             | 1772 (85.4)                             | 2510 (88.4)                             | 2748 (89.5)                             | 1322 (88.8)                                                              |
| Obesity                                                  | 2471 (18.4)         | 303 (13.1)                              | 291 (14.4)                              | 394 (19.0)                              | 587 (20.7)                              | 896 (21.4)                              | 319 (21.4)                                                               |
| Hypercholesterolemia                                     | 9014 (67.1)         | 1545 (66.9)                             | 1302 (64.4)                             | 1347 (64.9)                             | 1918 (67.6)                             | 2902 (69.3)                             | 1029 (69.2)                                                              |
| Hypertension                                             | 10041 (74.7)        | 1659 (71.9)                             | 1451 (71.7)                             | 1497 (72.1)                             | 2164 (76.3)                             | 3280 (78.0)                             | 1141 (76.7)                                                              |
| Type II diabetes, including insulin resistance           | 5191 (38.6)         | 841 (36.4)                              | 731 (36.2)                              | 742 (35.7)                              | 1140 (40.2)                             | 1737 (41.5)                             | 605 (40.7)                                                               |
| Peripheral vascular disease                              | 3480 (25.9)         | 521 (22.6)                              | 513 (25.4)                              | 515 (24.8)                              | 790 (27.8)                              | 114 (27.2)                              | 422 (28.4)                                                               |
| Peptic ulcer/GERD                                        | 3680 (27.4)         | 583 (25.3)                              | 471 (23.3)                              | 568 (27.4)                              | 833 (29.4)                              | 1225 (29.2)                             | 416 (28.0)                                                               |
| Renal disease                                            | 3397 (25.3)         | 576 (25.0)                              | 521 (25.8)                              | 478 (23.0)                              | 737 (26.0)                              | 1085 (25.9)                             | 362 (24.3)                                                               |
| Sleep apnea                                              | 2698 (20.1)         | 378 (16.4)                              | 342 (16.9)                              | 414 (19.9)                              | 624 (22.0)                              | 940 (22.4)                              | 370 (24.9)                                                               |
| Stroke                                                   | 538 (4.0)           | 63 (2.7)                                | 81 (4.0)                                | 75 (3.6)                                | 127 (4.5)                               | 192 (4.6)                               | 65 (4.4)                                                                 |
| Pneumonia or acute bronchitis/bronchiolitis              | 3288 (24.5)         | 602 (26.1)                              | 494 (24.4)                              | 504 (24.3)                              | 687 (24.2)                              | 1001 (23.9)                             | 341 (22.9)                                                               |
| <b>Baseline COPD Severity, n (%)</b>                     |                     |                                         |                                         |                                         |                                         |                                         |                                                                          |
| 1 moderate exacerbation and no severe                    | 4205 (31.3)         | 639(27.7)                               | 609(30.1)                               | 660(31.8)                               | 922(32.5)                               | 1375(32.8)                              | 498 (33.5)                                                               |
| ≥2 moderate or ≥1 severe exacerbations                   | 0(0.0)              | 0(0.0)                                  | 0(0.0)                                  | 0(0.0)                                  | 0(0.0)                                  | 0(0.0)                                  | 0 (0.0)                                                                  |
| Oxygen therapy                                           | 2793 (20.8)         | 527 (22.8)                              | 441 (21.8)                              | 410 (19.8)                              | 609 (21.5)                              | 806 (19.2)                              | 297 (20.0)                                                               |

|                                                                |              |             |             |             |             |             |               |
|----------------------------------------------------------------|--------------|-------------|-------------|-------------|-------------|-------------|---------------|
| Evidence of tobacco use                                        | 7854 (58.5)  | 1047 (45.3) | 936 (46.3)  | 1244 (59.9) | 1844 (65.0) | 2783 (66.4) | 952 (64.0)    |
| Pulmonologist visit within 30 days prior to index date         | 3491 (26.0)  | 534 (23.1)  | 512 (25.1)  | 564 (27.2)  | 714 (25.2)  | 1167 (27.9) | 446 (30.0)    |
| <b>Baseline Medication Use, n (%)</b>                          |              |             |             |             |             |             |               |
| Naïve to maintenance therapy                                   | 4818 (35.9)  | 857 (37.1)  | 709 (35.1)  | 733 (35.3)  | 996 (35.1)  | 1523 (36.4) | 638 (42.9)    |
| Naïve to long-acting bronchodilation therapy                   | 5044 (37.5)  | 894 (38.7)  | 743 (36.8)  | 769 (37.0)  | 1051 (37.0) | 1587 (37.9) | 655 (44.0)    |
| <b>Controller medications, in any combination, n (%)</b>       |              |             |             |             |             |             |               |
| Any LAMA                                                       | 4465 (33.2)  | 808 (35.0)  | 696 (34.4)  | 730 (35.2)  | 920 (32.4)  | 1311 (31.3) | 456 (30.7)    |
| Any LABA                                                       | 5445 (40.5)  | 769 (33.3)  | 716 (35.4)  | 767 (37.0)  | 1207 (42.5) | 1986 (47.4) | 708 (47.6)    |
| Any ICS                                                        | 5113 (38.1)  | 833 (36.1)  | 768 (38.0)  | 774 (37.3)  | 1147 (40.4) | 1591 (38.0) | 439 (29.5)    |
| <b>Rescue medications, in any combination, n (%)</b>           |              |             |             |             |             |             |               |
| Any SABA                                                       | 8442 (62.8)  | 1367 (59.2) | 1215 (60.1) | 1302 (62.7) | 1860 (65.5) | 2698 (64.4) | 956 (64.3)    |
| Any SAMA                                                       | 2395 (17.8)  | 391 (16.9)  | 340 (16.8)  | 360 (17.3)  | 546 (19.2)  | 758 (18.1)  | 253 (17.0)    |
| Oral corticosteroids                                           | 5010 (37.3)  | 765 (33.1)  | 759 (37.5)  | 796 (38.3)  | 1073 (37.8) | 1617 (38.6) | 581 (39.1)    |
| <b>Adjunct therapy, n (%)</b>                                  |              |             |             |             |             |             |               |
| Methylxanthines                                                | 210 (1.6)    | 41 (1.8)    | 32 (1.6)    | 35 (1.7)    | 43 (1.5)    | 59 (1.4)    | 21 (1.4)      |
| PDE-4 inhibitors                                               | 81 (0.6)     | 19 (0.8)    | 20 (1.0)    | 10 (0.5)    | 15 (0.5)    | 17 (0.4)    | 10 (0.7)      |
| Respiratory antibiotics                                        | 6448 (48.0)  | 1034 (44.8) | 966 (47.8)  | 1026 (49.4) | 1367 (48.2) | 2055 (49.1) | 743 (49.9)    |
| <b>Index Medication, n (%)</b>                                 |              |             |             |             |             |             |               |
| Closed TT                                                      | 1489 (11.1)  | 0 (0.0)     | 0 (0.0)     | 0 (0.0)     | 1 (0.04)    | 1488 (35.5) | 1,488 (100.0) |
| Open TT                                                        |              |             |             |             |             |             |               |
| ICL/LABA + LAMA                                                | 10547 (88.3) | 2233 (96.7) | 1871 (92.5) | 1837 (88.5) | 2410 (84.9) | 2196 (81.3) | –             |
| LAMA/LABA + ICS                                                | 518 (4.3)    | 9 (0.4)     | 42 (2.1)    | 77 (3.7)    | 179 (6.3)   | 211 (7.8)   | –             |
| ICS + LABA + LAMA                                              | 77 (0.6)     | 22 (1.0)    | 17 (0.8)    | 23 (1.1)    | 10 (0.4)    | 5 (0.2)     | –             |
| ICS/LABA + LAMA/LABA                                           | 466 (3.9)    | 1 (0.04)    | 35 (1.7)    | 80 (3.9)    | 159 (5.6)   | 191 (7.1)   | –             |
| Other combinations                                             | 338 (2.8)    | 44 (1.9)    | 57 (2.8)    | 59 (2.8)    | 79 (2.8)    | 99 (3.7)    | –             |
| <b>Index Prescribing Provider Specialty, n (%)<sup>c</sup></b> |              |             |             |             |             |             |               |
| Pulmonology                                                    | 4078 (30.4)  | 624 (27.0)  | 578 (28.6)  | 663 (31.9)  | 865 (30.5)  | 1348 (32.2) | 563 (37.8)    |
| Primary care                                                   | 4274 (31.8)  | 805 (34.9)  | 679 (33.6)  | 625 (30.1)  | 968 (34.1)  | 1197 (28.6) | 369 (24.8)    |
| Internal medicine                                              | 3720 (27.7)  | 723 (31.3)  | 649 (32.1)  | 596 (28.7)  | 737 (26.0)  | 1015 (24.2) | 297 (20.0)    |
| Allied health professional <sup>e</sup>                        | 1987 (14.8)  | 283 (12.3)  | 276 (13.7)  | 317 (15.3)  | 424 (14.9)  | 687 (16.4)  | 223 (15.0)    |
| Cardiology                                                     | 96 (0.7)     | 23 (1.0)    | 16 (0.8)    | 21 (1.0)    | 16 (0.6)    | 20 (0.5)    | 6 (0.4)       |
| Other specialty                                                | 689 (5.1)    | 133 (5.8)   | 114 (5.6)   | 132 (6.4)   | 116 (4.1)   | 194 (4.6)   | 64 (4.3)      |
| Unknown specialty                                              | 1077 (8.0)   | 101 (4.4)   | 90 (4.5)    | 109 (5.3)   | 291 (10.3)  | 486 (11.6)  | 69 (4.6)      |
